# Supplementary material for: Association between Anaemia in Children 6 to 23 Months Old and Child, Mother, Household and Feeding Indicators
Source: MDPI journal article supplement (doi:10.3390/nu10091269), 2018-09-08
Supplement: s1 [file s1]

## Supplementary

**Table S1.** Countries and years in sample.

| <b>World region</b>                    | <b>Country and survey year in parenthesis</b>                                                                                                                                                                                                                                                                                                                                                                                                                                                                                 |
|----------------------------------------|-------------------------------------------------------------------------------------------------------------------------------------------------------------------------------------------------------------------------------------------------------------------------------------------------------------------------------------------------------------------------------------------------------------------------------------------------------------------------------------------------------------------------------|
| Asia (11 surveys)                      | Azerbaijan (2006); Bangladesh (2011); Cambodia (2010, 2014); India (2005, 2015); Kyrgyzstan (2012); Myanmar (2015); Nepal (2006, 2011); Timor-Leste (2009)                                                                                                                                                                                                                                                                                                                                                                    |
| North-Africa & Middle-East (2 surveys) | Egypt (2014); Jordan (2012)                                                                                                                                                                                                                                                                                                                                                                                                                                                                                                   |
| Sub-Saharan Africa (33 surveys)        | Benin (2006, 2011); Burkina Faso (2010); Burundi (2010); Cameroon (2011); Congo (2011); Democratic Republic of the Congo (2013); Cote d'Ivoire (2011); Ethiopia (2011); Gabon (2012); Gambia (2013); Ghana (2014); Guinea (2012); Lesotho (2014); Malawi (2010, 2015); Mali (2012); Mozambique (2011); Namibia (2013); Niger (2012); Rwanda (2010, 2014); São Tomé and Príncipe (2008); Senegal (2010); Sierra Leone (2008, 2013); Swaziland (2006); Tanzania (2015); Togo (2013); Uganda (2006); Zimbabwe (2005, 2010, 2015) |
| Latin-America (6 surveys)              | Guatemala (2014); Guyana (2009); Haiti (2005, 2012); Honduras (2005, 2011)                                                                                                                                                                                                                                                                                                                                                                                                                                                    |

**Table S2.** Descriptive statistics of the sample.

|                                              | Asia  | North Africa and Middle East | Sub-Saharan Africa | Latin America | Total |
|----------------------------------------------|-------|------------------------------|--------------------|---------------|-------|
| <b>Dependent variable</b>                    |       |                              |                    |               |       |
| Anemia                                       | 70.1% | 44.9%                        | 75.6%              | 58.6%         | 70.2% |
| <b>Country and community variables</b>       |       |                              |                    |               |       |
| HDI at the time of the survey                | 81.9% | 100.0%                       | 9.7%               | 81.9%         | 61.5% |
| Mostly urban state                           | 3.9%  | 74.6%                        | 12.0%              | 21.1%         | 9.4%  |
| Access to community services                 | 53.7% | 100.0%                       | 6.3%               | 71.6%         | 42.6% |
| Access to health care                        | 41.9% | 100.0%                       | 77.8%              | 92.7%         | 57.9% |
|                                              | Asia  | North Africa and Middle East | Sub-Saharan Africa | Latin America | Total |
| <b>Household, mother and child variables</b> |       |                              |                    |               |       |
| Household size                               |       |                              |                    |               |       |
| 6 or more members                            | 57.9% | 43.8%                        | 58.0%              | 54.2%         | 57.3% |
| More than 3 children U5                      | 16.4% | 18.3%                        | 24.8%              | 15.5%         | 18.8% |
| Maternal education                           |       |                              |                    |               |       |
| No education                                 | 28.8% | 7.9%                         | 36.3%              | 13.6%         | 29.2% |
| Primary education                            | 15.5% | 6.9%                         | 37.5%              | 57.0%         | 25.2% |
| Secondary or higher                          | 55.7% | 85.2%                        | 26.2%              | 29.4%         | 45.7% |
| Mother younger than 18 years old             | 12.8% | 8.0%                         | 33.0%              | 33.4%         | 20.3% |
| Mother with anemia                           | 55.6% | 30.6%                        | 38.3%              | 21.9%         | 47.2% |
| Low birth weight child                       | 31.4% | 20.9%                        | 17.3%              | 19.5%         | 26.1% |
| Female child                                 | 47.9% | 47.4%                        | 50.0%              | 48.6%         | 48.5% |
| First born child                             | 36.3% | 24.9%                        | 22.4%              | 31.9%         | 31.7% |

| <b>Child feeding variables</b>  |        |       |        |        |         |
|---------------------------------|--------|-------|--------|--------|---------|
| Breast milk                     | 84.8%  | 52.8% | 82.1%  | 74.1%  | 82.3%   |
| Fortified milks                 | 9.8%   | 5.7%  | 5.7%   | 9.5%   | 8.5%    |
| Other milks                     | 39.7%  | 49.5% | 15.6%  | 33.8%  | 32.5%   |
| Fortified baby food             | 14.4%  | 7.6%  | 9.5%   | 27.8%  | 13.9%   |
| Foods made from grains          | 68.3%  | 73.9% | 65.5%  | 81.8%  | 68.8%   |
| Potatoes & other tubers         | 32.%   | 44.9% | 32.6%  | 46.%   | 33.6%   |
| Meat, poultry, fish, eggs       | 20.7%  | 57.6% | 41.7%  | 66.2%  | 31.5%   |
| Fruits and vegetables           | 43.3%  | 58.9% | 49.3%  | 55.4%  | 46.4%   |
| Dried beans, peas and nuts      | 15.1%  | 18.2% | 21.9%  | 58.1%  | 20.8%   |
| Other dairy products            | 15.5%  | 67.3% | 9.1%   | 34.9%  | 16.5%   |
| Other solid-semisolid foods     | 25.%   | 45.5% | 42.7%  | 54.3%  | 33.%    |
| <b>Child's health variables</b> |        |       |        |        |         |
| Wasting (WHZ<-2SD)              | 21.8%  | 7.2%  | 11.2%  | 3.3%   | 16.9%   |
| Overweight (WHZ>+2SD)           | 6.3%   | 19.3% | 11.7%  | 14.7%  | 8.9%    |
| Stunting (HAZ<-2SD)             | 34.4%  | 12.5% | 29.6%  | 27.7%  | 31.9%   |
| Diarrhea in last two weeks      | 15.1%  | 24.5% | 25.8%  | 29.9%  | 19.6%   |
| Fever in last two weeks         | 18.8%  | 27.%  | 27.4%  | 29.7%  | 22.4%   |
| Number of observations          | 82 343 | 3 231 | 39 440 | 11 529 | 136 543 |

**Table S3.** Traditional Logistic Regression by world regions and comparison between individual food and minimum dietary diversity regressions.

| VARIABLES                         | Asia                    | North Africa and Middle East | Sub-Saharan Africa      | Latin America           | All                     | All with the DDS       |
|-----------------------------------|-------------------------|------------------------------|-------------------------|-------------------------|-------------------------|------------------------|
| <b>Socio-economic variables</b>   |                         |                              |                         |                         |                         |                        |
| Wealth quintile                   |                         |                              |                         |                         |                         |                        |
| [lowest]                          |                         |                              |                         |                         |                         |                        |
| Lower                             | 0.89**<br>(0.80:0.98)   | 0.95<br>(0.81:1.11)          | 0.98<br>(0.90:1.06)     | 1.05<br>(0.92:1.20)     | 0.92**<br>(0.86:0.99)   | 0.93**<br>(0.87:0.99)  |
| Middle                            | 0.88**<br>(0.77:1.00)   | 0.75*<br>(0.56:1.01)         | 0.95<br>(0.87:1.03)     | 1.07<br>(0.91:1.25)     | 0.91**<br>(0.84:0.98)   | 0.91**<br>(0.84:0.99)  |
| High                              | 0.83**<br>(0.70:0.98)   | 0.81<br>(0.63:1.05)          | 0.95<br>(0.87:1.04)     | 0.95<br>(0.80:1.13)     | 0.88**<br>(0.79:0.97)   | 0.88**<br>(0.79:0.98)  |
| Highest                           | 0.79**<br>(0.65:0.96)   | 0.56***<br>(0.39:0.79)       | 0.80***<br>(0.72:0.89)  | 0.71***<br>(0.58:0.87)  | 0.80***<br>(0.70:0.91)  | 0.81***<br>(0.71:0.93) |
| Household size                    |                         |                              |                         |                         |                         |                        |
| 6 or more members                 | 1.03<br>(0.99:1.07)     | 1.13<br>(0.92:1.38)          | 1.01<br>(0.96:1.06)     | 1.02<br>(0.93:1.13)     | 1.03*<br>(1.00:1.06)    | 1.03**<br>(1.00:1.06)  |
| More than 3 children under 5      |                         |                              |                         |                         |                         |                        |
|                                   | 1.04<br>(0.98:1.09)     | 1.04<br>(0.87:1.24)          | 1.17***<br>(1.09:1.26)  | 1.06<br>(0.95:1.19)     | 1.09***<br>(1.05:1.14)  | 1.08***<br>(1.04:1.13) |
| Mother education [none]           |                         |                              |                         |                         |                         |                        |
| Primary education                 | 0.85***<br>(0.79:0.92)  | 1.15<br>(0.77:1.70)          | 0.86***<br>(0.79:0.93)  | 0.98<br>(0.89:1.07)     | 0.86***<br>(0.82:0.91)  | 0.86***<br>(0.82:0.91) |
| Secondary or higher               | 0.74***<br>(0.67:0.81)  | 0.98<br>(0.65:1.49)          | 0.78***<br>(0.71:0.86)  | 0.85**<br>(0.75:0.98)   | 0.74***<br>(0.70:0.80)  | 0.74***<br>(0.69:0.80) |
| <b>Mother and child variables</b> |                         |                              |                         |                         |                         |                        |
| Young mother (18y<)               |                         |                              |                         |                         |                         |                        |
|                                   | 1.01<br>(0.94:1.09)     | 1.33**<br>(1.06:1.69)        | 1.10***<br>(1.04:1.17)  | 1.07*<br>(0.99:1.17)    | 1.05**<br>(1.01:1.11)   | 1.06**<br>(1.01:1.10)  |
| Anemic mother                     |                         |                              |                         |                         |                         |                        |
|                                   | 1.85***<br>(1.71:2.01)  | 1.29***<br>(1.08:1.53)       | 1.71***<br>(1.60:1.82)  | 1.61***<br>(1.45:1.79)  | 1.78***<br>(1.68:1.89)  | 1.79***<br>(1.68:1.90) |
| Stunted mother                    |                         |                              |                         |                         |                         |                        |
|                                   | 1<br>(0.96:1.05)        | 1.16<br>(0.84:1.61)          | 1.01<br>(0.93:1.09)     | 0.94<br>(0.85:1.05)     | 1<br>(0.96:1.04)        | 0.99<br>(0.95:1.03)    |
| Low birth weight                  |                         |                              |                         |                         |                         |                        |
|                                   | 1.23***<br>(1.16:1.30)  | 1.25***<br>(1.07:1.47)       | 1.16***<br>(1.08:1.24)  | 1.04<br>(0.93:1.17)     | 1.20***<br>(1.15:1.26)  | 1.21***<br>(1.16:1.27) |
| Girl                              |                         |                              |                         |                         |                         |                        |
|                                   | 0.91**<br>(0.87:0.95)   | 0.91<br>(0.74:1.12)          | 0.83***<br>(0.78:0.87)  | 0.88***<br>(0.81:0.94)  | 0.89***<br>(0.86:0.92)  | 0.88***<br>(0.85:0.91) |
| Age group [6 to 8m]               |                         |                              |                         |                         |                         |                        |
| 9 to 11m                          | 1.09**<br>(1.01:1.18)   | 0.83<br>(0.58:1.19)          | 1.06<br>(0.96:1.16)     | 0.86**<br>(0.75:0.98)   | 1.06*<br>(1.00:1.11)    | 1.06**<br>(1.00:1.12)  |
| 12 to 14m                         | 1.18***<br>(1.08:1.28)  | 0.88<br>(0.63:1.22)          | 0.94<br>(0.85:1.04)     | 0.72***<br>(0.64:0.82)  | 1.06<br>(0.98:1.14)     | 1.07**<br>(1.00:1.15)  |
| 15 to 17m                         | 1.15**<br>(1.01:1.31)   | 0.85**<br>(0.73:0.99)        | 0.83***<br>(0.74:0.93)  | 0.53***<br>(0.46:0.61)  | 0.98<br>(0.88:1.10)     | 0.99<br>(0.89:1.11)    |
| 18 to 20m                         | 1.08<br>(0.95:1.23)     | 0.71***<br>(0.57:0.90)       | 0.67***<br>(0.59:0.76)  | 0.46***<br>(0.39:0.55)  | 0.88**<br>(0.78:0.99)   | 0.89*<br>(0.79:1.01)   |
| 21 to 23m                         | 0.89<br>(0.75:1.07)     | 0.71***<br>(0.58:0.86)       | 0.62***<br>(0.55:0.71)  | 0.32***<br>(0.27:0.38)  | 0.74***<br>(0.63:0.86)  | 0.75***<br>(0.65:0.86) |
| First born child                  |                         |                              |                         |                         |                         |                        |
|                                   | 1<br>(0.96:1.05)        | 0.91<br>(0.75:1.10)          | 1.09***<br>(1.03:1.16)  | 1.04<br>(0.95:1.15)     | 1.03<br>(0.99:1.06)     | 1.02<br>(0.99:1.06)    |
| <b>Child feeding variables</b>    |                         |                              |                         |                         |                         |                        |
| Breast milk                       |                         |                              |                         |                         |                         |                        |
|                                   | 0.94<br>(0.85:1.04)     | 1.22 *<br>(0.98:1.51)        | 1.11 ***<br>(1.03:1.21) | 1.18 ***<br>(1.06:1.32) | 1.05<br>(0.98:1.12)     | 1.05<br>(0.97:1.13)    |
| Fortified milks                   |                         |                              |                         |                         |                         |                        |
|                                   | 0.83 ***<br>(0.77:0.90) | 0.84<br>(0.55:1.27)          | 0.80 ***<br>(0.70:0.92) | 0.86*<br>(0.72:1.01)    | 0.83 ***<br>(0.78:0.89) |                        |
| Other milks                       |                         |                              |                         |                         |                         |                        |
|                                   | 1.09 ***<br>(1.02:1.17) | 0.88<br>(0.71:1.10)          | 1.08 *<br>(0.99:1.18)   | 0.93<br>(0.83:1.05)     | 1.09 ***<br>(1.02:1.16) |                        |

|                                 |                         |                       |                         |                         |                         |                         |
|---------------------------------|-------------------------|-----------------------|-------------------------|-------------------------|-------------------------|-------------------------|
| Fortified baby food             | 0.84 ***<br>(0.78:0.92) | 0.84 *<br>(0.69:1.03) | 0.89 **<br>(0.81:0.98)  | 0.94 *<br>(0.86:1.02)   | 0.86 ***<br>(0.81:0.92) |                         |
| Bread, rice, noodles            | 1.10 **<br>(1.02:1.18)  | 1.09<br>(0.86:1.37)   | 1.07 **<br>(1.01:1.13)  | 1.20 ***<br>(1.07:1.34) | 1.10 ***<br>(1.05:1.16) |                         |
| Potatoes and other tubers       | 0.94 *<br>(0.88:1.01)   | 0.99<br>(0.85:1.16)   | 0.94**<br>(0.88:0.99)   | 0.89 ***<br>(0.82:0.96) | 0.94 **<br>(0.91:0.99)  |                         |
| Meat, poultry, fish, eggs       | 0.78 ***<br>(0.70:0.88) | 0.91<br>(0.77:1.07)   | 1.13 ***<br>(1.07:1.20) | 1.02<br>(0.92:1.12)     | 0.91***<br>(0.84:0.98)  |                         |
| Fruits and vegetables           | 0.99<br>(0.93:1.05)     | 0.93<br>(0.78:1.12)   | 0.90 ***<br>(0.84:0.95) | 0.99<br>(0.91:1.07)     | 0.97<br>(0.93:1.01)     |                         |
| Beans, peas, lentils and nuts   | 0.97<br>(0.90:1.06)     | 1.15<br>(0.96:1.38)   | 0.94*<br>(0.88:1.00)    | 1.06<br>(0.97:1.16)     | 0.97<br>(0.92:1.01)     |                         |
| Other dairy products            | 1.17 ***<br>(1.06:1.30) | 1.07<br>(0.97:1.19)   | 0.96<br>(0.86:1.07)     | 0.98<br>(0.89:1.08)     | 1.08 **<br>(1.01:1.16)  |                         |
| Other solid-semisolid food      | 0.88 ***<br>(0.82:0.94) | 0.94<br>(0.77:1.14)   | 1.02<br>(0.96:1.08)     | 0.93<br>(0.82:1.05)     | 0.92 ***<br>(0.88:0.96) |                         |
| Dietary Diversity Score >3      |                         |                       |                         |                         |                         | 0.89 ***<br>(0.84:0.94) |
| Fortified foods                 |                         |                       |                         |                         |                         | 0.84 ***<br>(0.79:0.89) |
| <b>Child's health variables</b> |                         |                       |                         |                         |                         |                         |
| Wasting (WHZ<-2SD)              | 1.16 ***<br>(1.09:1.23) | 0.68 *<br>(0.45:1.02) | 1.17 ***<br>(1.07:1.29) | 0.94<br>(0.75:1.18)     | 1.15 ***<br>(1.09:1.21) | 1.15 ***<br>(1.09:1.22) |
| Overweight (WHZ>+2SD)           | 0.87 **<br>(0.76:0.98)  | 0.95<br>(0.80:1.12)   | 0.76 ***<br>(0.67:0.85) | 0.88<br>(0.73:1.07)     | 0.83 ***<br>(0.77:0.90) | 0.83 ***<br>(0.77:0.90) |
| Stunting (HAZ<-2SD)             | 1.26 ***<br>(1.20:1.32) | 1.04<br>(0.83:1.31)   | 1.14 ***<br>(1.07:1.22) | 1.23 ***<br>(1.11:1.37) | 1.23***<br>(1.18:1.28)  | 1.23 ***<br>(1.18:1.28) |
| Diarrhea in last two weeks      | 1.08 **<br>(1.01:1.17)  | 1.11<br>(0.93:1.32)   | 1.04<br>(0.98:1.10)     | 1.12 **<br>(1.01:1.23)  | 1.08 ***<br>(1.03:1.13) | 1.08 ***<br>(1.03:1.13) |
| Fever in last two weeks         | 1.08 ***<br>(1.03:1.14) | 1.17<br>(0.93:1.48)   | 1.24 ***<br>(1.16:1.33) | 0.98<br>(0.86:1.12)     | 1.11 ***<br>(1.07:1.16) | 1.12 ***<br>(1.07:1.16) |

**Note:** Significance \*\*\* p<0.01, \*\* p<0.05, \* p<0.1

**Table S4.** Comparison between the Odds Ratio (OR) estimated from a logistic regression and the Risk Ratio (RR) estimated using the Delta Method approximation from the logistic regression.

|                                   | OR                   | RR                   |
|-----------------------------------|----------------------|----------------------|
| <b>Socio-economics</b>            |                      |                      |
| Wealth quintile (Ref lowest)      |                      |                      |
| Lower                             | 0.92 ** (0.86–0.99)  | 0.98 ** (0.96–1)     |
| Middle                            | 0.91 ** (0.84–0.98)  | 0.97 ** (0.95–0.99)  |
| High                              | 0.88 ** (0.79–0.97)  | 0.96 ** (0.93–0.99)  |
| Highest                           | 0.80 *** (0.70–0.91) | 0.94 *** (0.9–0.97)  |
| Household size                    |                      |                      |
| 6 or more members                 | 1.03 * (1.00–1.06)   | 1.01 * (1–1.02)      |
| More than 3 children under 5      | 1.09 *** (1.05–1.14) | 1.02 *** (1.01–1.03) |
| Mother education                  |                      |                      |
| Primary education                 | 0.86 *** (0.82–0.91) | 0.96 *** (0.95–0.98) |
| Secondary or higher               | 0.74 *** (0.70–0.80) | 0.92 *** (0.9–0.94)  |
| <b>Mother and child variables</b> |                      |                      |
| Young mother (18y<)               | 1.05 ** (1.01–1.11)  | 1.02 *** (1–1.03)    |
| Anemic mother                     | 1.78 *** (1.68–1.89) | 1.17 *** (1.15–1.2)  |
| Stunted mother                    | 1 (0.96–1.04)        | 1 (0.99–1.01)        |
| Low birth weight                  | 1.20 *** (1.15–1.26) | 1.05 *** (1.04–1.06) |
| Girl                              | 0.89 *** (0.86–0.92) | 0.97 *** (0.96–0.98) |
| Age group [6 to 8m]               |                      |                      |
| 9 to 11m                          | 1.06 * (1.00–1.11)   | 1.01* (1–1.03)       |
| 12 to 14m                         | 1.06 (0.98–1.14)     | 1.02 (1–1.03)        |
| 15 to 17m                         | 0.98 (0.88–1.10)     | 0.99 (0.96–1.03)     |
| 18 to 20m                         | 0.88 ** (0.78–0.99)  | 0.96 ** (0.93–1)     |
| 21 to 23m                         | 0.74 *** (0.63–0.86) | 0.91 *** (0.87–0.96) |
| First born child                  | 1.03 (0.99–1.06)     | 1.01 (1–1.02)        |
| <b>Child feeding variables</b>    |                      |                      |
| Breast milk                       | 1.05 (0.98–1.12)     | 1.01 (0.99–1.03)     |
| Fortified milks                   | 0.83 *** (0.78–0.89) | 0.95 *** (0.93–0.97) |
| Other milks                       | 1.09 *** (1.02–1.16) | 1.02 *** (1.01–1.04) |
| Fortified baby food               | 0.86 *** (0.81–0.92) | 0.96 *** (0.94–0.98) |
| Bread, rice, noodles              | 1.10 *** (1.05–1.16) | 1.03 *** (1.02–1.05) |
| Potatoes and other tubers         | 0.94 ** (0.91–0.99)  | 0.99 ** (0.97–1)     |
| Meat, poultry, fish, eggs         | 0.91 *** (0.84–0.98) | 0.97 *** (0.95–0.99) |
| Fruits and vegetables             | 0.97 (0.93–1.01)     | 0.99 (0.98–1)        |
| Beans, peas, lentils and nuts     | 0.97 (0.92–1.01)     | 0.99 (0.98–1)        |
| Other dairy products              | 1.08 ** (1.01–1.16)  | 1.02 ** (1–1.04)     |
| Other solid-semisolid food        | 0.92 *** (0.88–0.96) | 0.98 *** (0.96–0.99) |
|                                   | OR                   | RR                   |
| <b>Child's health variables</b>   |                      |                      |
| Wasting (WHZ<-2SD)                | 1.15 *** (1.09–1.21) | 1.04 *** (1.02–1.05) |
| Overweight (WHZ>+2SD)             | 0.83 *** (0.77–0.90) | 0.95 *** (0.93–0.97) |
| Stunting (HAZ<-2SD)               | 1.23 *** (1.18–1.28) | 1.06 *** (1.05–1.07) |
| Diarrhea in last two weeks        | 1.08 *** (1.03–1.13) | 1.02 *** (1.01–1.03) |
| Fever in last two weeks           | 1.11 *** (1.07–1.16) | 1.03 *** (1.02–1.04) |

**Note:** Significance \*\*\* p<0.01, \*\* p<0.05, \* p<0.1

**Table S5: Likelihood ratio test to verify the homogeneity assumption across geographical regions**

Assumption: (All) nested in (Asia, MENA, SSA, LA)

LR  $\chi^2(81) = 595.38$ ; Prob >  $\chi^2 = 0.0000$

| Model | Obs     | ll(null) | ll(model) | df  | AIC      | BIC      |
|-------|---------|----------|-----------|-----|----------|----------|
| All   | 136 543 | -80414.7 | -73169.3  | 578 | 147494.5 | 153152.3 |
| Asia  | 82 343  | -48306.4 | -44758.1  | 190 | 89896.2  | 91659.01 |
| MENA  | 3 231   | -2254.72 | -2152     | 40  | 4384.002 | 4627.899 |
| SSA   | 39 440  | -21228.9 | -19079.2  | 329 | 38816.48 | 41630.06 |
| LA    | 11 529  | -7535.92 | -6882.24  | 100 | 13964.49 | 14696.17 |

Abbreviations: MENA: Middle East and North Africa; SSA: Sub-Saharan Africa; LA: Latin America; df: degrees of freedom; AIC: Akaike's information criterion; BIC Bayesian information criterion.

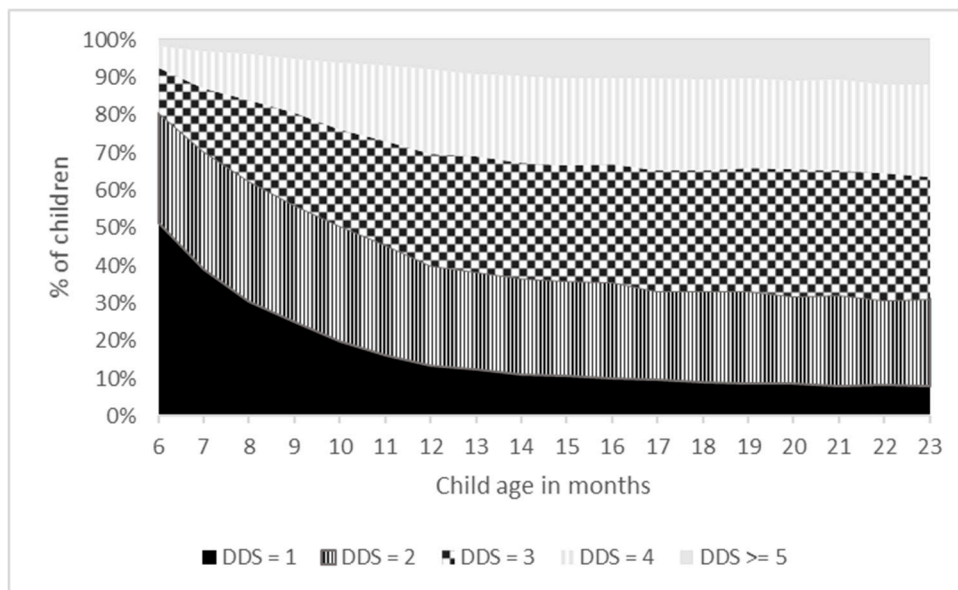

**Graph S1.** Dietary diversity by age in months. Abbreviation: DDS: Dietary Diversity Score.
